# Supplementary material
Source: publisher figshare collection journal article supplement (https://frontiersin.figshare.com/ndownloader/files/22816148)
Supplement: Supplementary file [file 22816148]

## Supplementary Data

List of sequences used to generate alignment of mature Wamide consensus sequences in Figure 2.

### Annelida

>XP\_009012861.1 hypothetical protein HELRODRAFT\_168750 [Helobdella robusta]  
MIGQNITITLTFIIISLLHLSINNSLASAASTKNVDNDDNQQYSKLYNDVEENGDNNDVTFE  
SDKRKWSSNNMGMWGGKRSSELDLTPKRAWSSNKMAMWGRKKKSPKIENNGGNDVDVI  
NDGSSNDNYHNLDEKDLGENAEKREWASNYMGMWGGKRSQMMPPDNLHFPFYIISGN  
KRKVIDAGSWMNQPAIQRRSKWGS GMMM WGGKRSKQGT FNSDDD VIPAPDDV  
Eukaryota; Metazoa; Lophotrochozoa; Annelida; Clitellata; Hirudinea; Rhynchobdellida;  
Glossiphoniidae; Helobdella.

>ELU01469.1 hypothetical protein CAPTEDRAFT\_197880 [Capitella teleta]  
MASCRLLLTVITLVICSLVVLADDPETEEQAQDLVPHDMDQDLMDKRK WGSNSMRVW  
GKR DGDDEMEMDGGAEKRK WGGNNMRVW GKRK WGANSMRVW GKRSELPEEEKR  
KWGGSNTMRTW GKRADDNEEDELAKRK WGSNSMRVW GKRADDNKRK WGSNSMRV  
W GKRADDDMDESKRGWKNNMRVW GKRADDEIDEDKRK WGSNSMRVW GKR SADD  
DAELAAAVPHAIVKRSLDSEFTDDMEKRR WGGNDMRVW GKR RSRADGPKRSWKTN  
VMRVW GKR GWADNNMRVW GKRADEGAEKRAWVGDKSLSWGKRSDNEVIRNLLAE  
QVMMSIISPTKYLRDVAICVGGVLGGFSRDPLSE  
Eukaryota; Metazoa; Lophotrochozoa; Annelida; Polychaeta; Scolecida; Capitellida;  
Capitellidae; Capitella.

>AFV92893.1 MIP/allatostatin B neuropeptide precursor [Platynereis dumerilii]  
MDRVTITCFSLCLASVLIPLVHSEENVLDLDEDKRAWMKNNIAW GKR GWKQGASYSWG  
KRDSEGDGLMSDEEKRAWNKNNMRVW GKR SDEDDKRGWKDSSMRVW GKRAGEDD  
NNKRW GKNL RVW GKRADDDLEVLDEKRAWGDNNMRVW GKRSDLEDDKRAWNKNS  
MRVW GKR DMEEDDNKRAWKGQSARVW GKRADEDDKRGWNGNSMRVW GKR GWH  
GNGVRQW GKR LHLDDVEPILDDEESKRAWAKNNMRVW GKR STDNVRNMKAVVAEP  
AEVAADAESA KSS  
Eukaryota; Metazoa; Lophotrochozoa; Annelida; Polychaeta; Palpata; Aciculata; Phyllodocida;  
Nereididae; Platynereis.

### Brachiopoda

>XP\_013388469.1 protein RNA-directed DNA methylation 3 [Lingula anatina]  
MAAITADSLTITFFLTLMVLSSPLVHCVINSQMLRDAQNLDAQPYGRYIEEDIVIPNDSQE  
EENSHRYQSQA VSLKRLEYLFNKLENNIMRNEPLKRQWSKSMTMWGKRSPYFYSEDM  
EDPHALRLRRRSLEKTDDNNKTKEKTDFQLTNNVIRSWKSGGMKLWGKRPFDKEMEES  
RDADLKKLGENMDWKQKERDLKRSWSGNAMKLWGKRDNFTDDQHDKKSWSKSNM  
KLWGKREDDKRSWNSKSLKVW GKR DVDQADEENNKRSWSSKNMKLWGKRNEQKDG  
LEYEKRPWSSSKMKLWGKRDN SVEADINEKRQWNSNGMKVW GKRMDGEIIDELSNKR  
KWNSEKMKLWGKRDSIQHNALNEKRGWNAKG MKLWGKRSEKRPWNGKGMKLWGK  
RDSSGYESESNNYPYLYRKRSIDVDSKRSWKS GGIKLWGKRDMADGDVDLVSNLRPAG

GVKRPWNSGMKLWGKKRASDSLRFDSA KSDSWIQDGKRSWIGKNPWATKIGFDPSK  
RWRSMKLWGKRDSGQSQHDYEDALNKWNSMKLWGKDLTSLIKAEIGNNSNTKSLSNE  
FEEKVFDHGV DNETNTETGSSPLNKEISNEHVTTTRHTLSKRSGWMPREGLRNMWG  
Eukaryota; Metazoa; Lophotrochozoa; Brachiopoda; Linguliformea; Lingulata; Lingulida;  
Linguloidea; Lingulidae; Lingula.

#### Mollusca

>NP\_001191611.1 PTSP-like peptide neurotransmitter precursor [*Aplysia californica*]  
MTLHLASPFILLFTIAYSLTSAVQGLEPLPAASLSDSPASGADVPLPSSAATNAAVDKE  
WLRQKLEEGQFLPQQDKRWGGINSWMTHRLGGPSE RDSSQDSL KQLLVNNVQNYDD  
SSKRKWSKFSSWGKR DASEETPEGGE GEDGLGAVKKWKNMAVWGKRAEDGLDKRW  
KQMATWVGKREDGDVLGLGTDKRWKQMASWGKRLDDSDRDKKWKQMSVWGKRED  
NGEPLDKKWKEMSVWGKRDTLDDPEKRWKQMAVWGKRQGLDDRNDKRWKQMAT  
WGKRNSSEN YDKRWKQMSVWGKR DGDGDLDKRWKQMSVWGKR DGDGDLDKRWK  
QMSVWGKRNGDGDLDKRWKQMSVWGKR DGEDVEKRWKQMSVWGKR DGDADLD  
KRWKQMSVWGKRDE DGNLDKRWKQMSVWGKRDE DGNLDKRWKQMSVWGKR DGD  
DNLDKRWKQMSVWEREREREWV  
Eukaryota; Metazoa; Lophotrochozoa; Mollusca; Gastropoda; Heterobranchia; Euthyneura;  
Euopisthobranchia; Aplysiida; Aplysioidea; Aplysiidae; Aplysia.

>XP\_009051899.1 hypothetical protein LOTGIDRAFT\_231501 [*Lottia gigantea*]  
MDLKTILCLIIYSLLLQISHAE EQLANDIELSNSLN PVDKRAWKSSYLNTWGKRWNPRYN  
LRGYQRMPIWAKRWTNSGLITWGKR SADTEIPIHKRKWNQFITWGKRSGVPSIVKRSVG  
DELVPWGKNKDTLPELNTSSDNL DNKLIDLETPSTDKLSLDEKRASDKGWN GFTTWG  
KRANKDWSSLSTWGKR GQNKDWSSLTTWGKR GHDRDWN SLTTWGKRANKDWSSLS  
TWGKRARENDWSALSTWGKR ANNKDWASLTTWGKR ANDRDWN SLTTWGKR AKGN  
NWSGLTTWGKRANKDWN SLTTWGKRANKDW SGLTTWGKR GNKDW SGLTTWGKR G  
NKDW SGLTTWGKR GNKDW SGLTTWGKR GNKDW SGLTTWGKR GNKDW SGLTTWGKR  
RGNKDW SGLTTWGKR GNNDW SGLTTWGKR GNKDW SGLTTWGKR SPDATSEDSGELS  
TLDKKDIKGWNG LTTWGKR FAGDKNK WSSLTTWGKR DDNNKQDDKKWAQLSTWGK  
RSPEDAAELWKIYDSNGD GIMDK EEMVSFLRSAASQKDSQQDEKS  
Eukaryota; Metazoa; Lophotrochozoa; Mollusca; Gastropoda; Patellogastropoda; Lottioidea;  
Lottiidae; Lottia.

>XP\_011417556.1 PREDICTED: uncharacterized protein LOC105321065 [*Crassostrea gigas*]  
MLCHLEQ LLLSCIVLCLVKV CASLKAQDEASVNDH DIVRRQAMGHSFGDELEGFDLDP  
KRVNNWNQFPAWGKRLSKRRWSSLGAWGKR SWLDRLISANNNWGKRWKSMSNSWG  
KRQAPSEFDGLSDDYINIKRSVDSKF SHNSRNKR SIPTELSPEQNEEKRRWSSLSAWGK  
RSDDDEKRRWSSLSAWGKR SNPEAIDDNDSDNISKRWSSFS SWGKR GDPVDLSKRLY  
SYWQNRLMTNNP WMERRGWN AFSSWGKR SMD  
Eukaryota; Metazoa; Lophotrochozoa; Mollusca; Bivalvia; Pteriomorphia; Ostreoida; Ostreoidea;  
Ostreidae; Crassostrea.

>XP\_014775853.1 PREDICTED: uncharacterized protein LOC106873140 [*Octopus bimaculoides*]

MATFLNFLLFVTVLALTKFSTLSAELNELSNKQSAIKVARSMMPAKFLESDLEAWDEKI  
GDQRNWEDRLNMKRNWDELSSWGKRSAFDNNAIDNEFGNSLRRALNSHNLKLSSLLN  
GAELQKRWDSLQAWGKRNANGNEAAYGKNVKRDHMKASDGTWKKVGSADGDKR  
GNGWDEMNGWGKRNAVQHKIRSRNWDSLQAWGKRSPSDDSALEYENNQRQKRSTGK  
IL

Eukaryota; Metazoa; Lophotrochozoa; Mollusca; Cephalopoda; Coleoidea; Neocoleoidea;  
Octopodiformes; Octopoda; Incirrata; Octopodidae; Octopus.

#### Arthropoda

>KZS20495.1 AST-B/myoinhibitory peptide-like protein [Daphnia magna]

MQLWQCPLLLMVSLIAAINTQQTPSQQRFEPNQVAELVELHQQLGPSREQQEQPAQAD  
NKDHQLAASPAALLQLTPSDWRSSDKRNWNRMQGMWGKRSQQQSDESATLHDMTP  
QRMVKRAWSDLSQQGWGKRSWTQLHGVWGKRRWDQLHGAWGKRTVDGQVDSQED  
QSAETEREDVSDSDELETSKRSGWNKMQGVWGKRSDTPNLDGIGNNDLLLMLSGDQL  
YLKDDDQPTAKLVEDDENGESTNKRAWNQMQGVWGKRALSAMAAGYKRNWNNLRG  
AWGKREIPAAVAKGMEWSRKRESGWNNLKGLWG

Eukaryota; Metazoa; Ecdysozoa; Arthropoda; Crustacea; Branchiopoda; Diplostraca; Cladocera;  
Anomopoda; Daphniidae; Daphnia.

>XP\_018024231.1 PREDICTED: prothoracicostatic peptide-like [Hyaella azteca]

MGWVRIRENISIVRFMVILSLVWTSASEQSIHKSTNNFGPANQSFLSRVTSEKSAVADG  
GELNVYGTSSSEHVAQEAEPEPNLLIDDELRTKRDGEKWSSLRGSWGKRNPALDRG  
WNNFRGTWGKKADWSSLRGSWGKRGSADAMADKRADWSNFRGSWGKRRTSAPEASLD  
DSVSDLDQFDHDYDAFNEDPSSALSPDDATRLNNDALFLETVKLLSQRAQNKEDFADQ  
EILNSGDDEEQNLVQKRSTAAYSGWLKRPVGTLLLAPRSVNWSSLRGSWGKRSGPTNW  
SSLRGTWGKRPAKDSNWAGLRGTWGKRPAKDSNWADLRGTWGKRPAKDSNWANLR  
GTWGKRPAKDSNWANLRGTWGKRPAKDSNWADLRGTWGKKSGGQKWSSLRGTWG  
KRSDQVDELDLGDE

Eukaryota; Metazoa; Ecdysozoa; Arthropoda; Crustacea; Malacostraca; Eumalacostraca;  
Peracarida; Amphipoda; Senticaudata; Talitrida; Talitroidea; Hyalellidae; Hyalella.

>ATQ64324.1 B-type allatostatin [Megabalanus volcano]

MWTRCLLLSWACLLLLLTVRAGSAEAEQPQAVTAGKRDWDALHGNWGKRQPSEVIDD  
PEDDRELMREVAGDLVLSGYEPEDKRKWNSTFTGSWGKRAKWNNFSGSWGKRKWNNS  
MGPSWGKRAKWDNFGGSWGKRKGWENFGGSWGKRKNWDFNGAWGKRKGWDSFS  
GGWGKRAAWNNFGGSWGKRDAASLPTLQEASDPLETFIKNNYKLLQARVPASSGQTQA  
RKRKDWTQLNGMWGKRSPAKELLLV

Eukaryota; Metazoa; Ecdysozoa; Arthropoda; Crustacea; Maxillopoda; Cirripedia; Thoracica;  
Sessilia; Balanidae; Megabalanus.

>NP\_001137202.1 allatostatin type b precursor [Tribolium castaneum]

MMSFAAAIMRDAVAPVLGAVLLTCYSLQATLALSDETPLKSSNDNPQIEDEMSKRDWN  
KDLHIWGKRGWNNLHEGWGRKRSVPAWEEQQEKRAWQSLQSGWGKRFAPEDEYAIR  
QLAAMLDSQYDDYNPEIETNDDEKRNWGGQFHGGWGKRKWDNFRGSWGKREPAWSN  
LKGIWGKRSGEK

Eukaryota; Metazoa; Ecdysozoa; Arthropoda; Hexapoda; Insecta; Pterygota; Neoptera; Holometabola; Coleoptera; Polyphaga; Cucujiformia; Tenebrionidae; Tenebrionidae incertae sedis; Tribolium.

>NP\_001036890.1 prothoracicostatic peptide precursor [*Bombyx mori*]  
MRWCLFALWVFGVATVVTAAEEPHHDAAPQTDNEVDLTEDDKRAWSSLHSGWAKRA  
WQDMSSAWGKRAWQDLNSAWGKRGWQDLNSAWGKRAWQDLNSAWGKRGWQDLN  
SAWGKRDDDEAMEKKSQDLNSVWGKRAWQDLNSAWGKRAWQDLNSAWGKRGW  
NDISSVWGKRAWQDLNSAWGKRAWQDMSSAWGKRAPEKWA AFHGSWGKRSSIEPD  
YEEIDAVEQLVPYQQAPNEEHIDAPEKKAWSALHGTWGKRPVKPMFNNEHSATTNEA  
Eukaryota; Metazoa; Ecdysozoa; Arthropoda; Hexapoda; Insecta; Pterygota; Neoptera;  
Holometabola; Lepidoptera; Glossata; Ditrysia; Bombycoidea; Bombycidae; Bombycinae;  
Bombyx.

>XP\_021915053.1 prothoracicostatic peptide [Zootermopsis nevadensis]  
MEYFAIPGVILWLLLLAVSPSSQGDPISDPARVPPGSGPSGGTLSRAQDVPTQVQGPEED  
KRGWRDLQGGWGKRGWQDLQIPYSHSPEEM EYFAIPGVILWLLLLAVSPSSQGDPISDP  
ARVPPGSGPSGGTLSRAQDVPTQVQGPEEDKRGWRDLQGGWGKRGWQDLQGGWGKR  
GWQDLQGGWGKRGWQDLQGGWGKRGWQDLQGGWGKRGWQDLQGGWGKRGWQD  
LQGGWGKRGWQDLQGGWGKRGWQDLQGGWGKRGWQDLQGGWGKRGWQDLQGG  
WGKRGWQDLQGGWGKRGWDKFHGSWGKRDSLDLDFDVNSLDNDVADEELVDEESGE  
DLKRAWSSLKGGWGKRAADWANFRGSWGKRDPGWNNLKGLWGKRADTNWNRLSA  
AWGKRSIGGETGIKEDPARVMSSSEE

Eukaryota; Metazoa; Ecdysozoa; Arthropoda; Hexapoda; Insecta; Pterygota; Neoptera;  
Polyneoptera; Dictyoptera; Blattodea; Blattoidea; Termitoidae; Termopsidae; Zootermopsis.

>XP\_014260688.1 prothoracicostatic peptide isoform X2 [*Cimex lectularius*]  
MSWRTLFLAWVAVAINCEVPDFVGPQSPLDEETNSALNLPEDSPNKKAWKDLTTAWG  
KRGWKDLPATGWGKRGWQDLQSAWGKRGWTDLNSGGWGKRGWQDLNSGGWGKR  
GWQDLNSGGWGKRGWQDLQAPAWGKREEKSLDEKESEGEDAKRSWVSLHSGWGKR  
AADWGSFRGSWGKKDPAWQNLKGLWGKRNYNGFMEPYDPGYNTLDEEGRRAK  
Eukaryota; Metazoa; Ecdysozoa; Arthropoda; Hexapoda; Insecta; Pterygota; Neoptera;  
Paraneoptera; Hemiptera; Heteroptera; Panheteroptera; Cimicomorpha; Cimicidae; Cimex.

>AAF49354.1 myoinhibiting peptide precursor [*Drosophila melanogaster*]  
MAHTKTRRTYGFLMVLILGSACGNLVASGSAGSPPSNEPGGGGLSEQVVLDQLSESDL  
YGNNKRAWQSLQSSWGKRSSSGDVSDPDYMTGHFVPLVITDGTNTIDWDTFERLASG  
QSAQQQQQQPLQQSQSGEDFDDLAGEPDVEKRAWKSMNVAWGKRRQAQGWNKFR  
GAWGKREPTWNNLKGMWGKRDQWQKLHGGWGKRSQPSN  
Eukaryota; Metazoa; Ecdysozoa; Arthropoda; Hexapoda; Insecta; Pterygota; Neoptera;  
Holometabola; Diptera; Brachycera; Muscomorpha; Ephydroidea; Drosophilidae; *Drosophila*;  
*Sophophora*.

>XP\_021196035.1 prothoracicostatic peptide-like isoform X1 [*Helicoverpa armigera*]

MRYCVAALWLSALITLVVAAADDAHHDVAPAQNDNEIELTEEEKRAWSSLHGGGGWG  
KRGWQDMSSAWGKRGWNDMSSAWGKRGWNDMSSAWGKRAWQDLNSAWGKRGW  
QDLNSAWGKRAWRDMSQSPWGKRGWQDMSSAWGKRGWNDMSSAWGKRGWNDMS  
SAWGKRGWNDMSSAWGKRGPEKWANFHGSWGKRSEDPDYEEIDAAIEQLIPIQLSES  
ERMDTPEKKAWSALHGAWGKRPVKQAQYNSGSYYWKREPAWTNLRGMWGKRSGQV  
DADAVIDDDHESSARDEA

Eukaryota; Metazoa; Ecdysozoa; Arthropoda; Hexapoda; Insecta; Pterygota; Neoptera;  
Holometabola; Lepidoptera; Glossata; Ditrysia; Noctuoidea; Noctuidae; Heliothinae;  
Helicoverpa.

>AKN21242.1 allatostatin-B precursor, partial [Locusta migratoria]

AWQDLGSAWGKRAWQDLGSAWGKRAWQDLNAGWGKRAWQDLGSAWGKRAWQDL  
NAGWGKRGWRDLQSAWGKRAWNLNGAWGKRGGDDEATWPELPDQTITEDEDGDH  
DLMQMOMPLPLAMQLQGDEGEPGDEQKRAWSSLHGAWGKRAADWRAFHGSWGKRE  
PGWTNLKGLWGKRAGPSNWNRLPAVWGKRSEDE

Eukaryota; Metazoa; Ecdysozoa; Arthropoda; Hexapoda; Insecta; Pterygota; Neoptera;  
Polyneoptera; Orthoptera; Caelifera; Acrididea; Acridomorpha; Acridoidea; Acrididae;  
Oedipodinae; Locusta.

>XP\_013784813.1 prothoracicostatic peptide-like [Limulus polyphemus]

MKFPTYGFCILFIFHVVIQIQSKPTDMDTLDDALANVENEAGDKRGWNNLSGMWGKR  
GWNNLSGMWGKRGSSWNLDSGMWGKRGWNNLSEILGKRSSGWNNLSGMWGKRGW  
NNLSGMWGKRSSKWNNLKGLWGKRAISPLDEERIAWDIVESDNFSPVNHQLLANILSE  
D

Eukaryota; Metazoa; Ecdysozoa; Arthropoda; Chelicerata; Merostomata; Xiphosura; Limulidae;  
Limulus.

>XP\_030023380.1 prothoracicostatic peptide-like [Manduca sexta]

MRCCVAVLWAFFATWAVAAAEPPHDAAPQTDNELDLTDEDKRAWTSLRGGWAKRG  
WQDMSSAWGKRAWQDLNSAWGKRAWQDLNSAWGKRAWQDLNSAWGKRGWQDLN  
SAWGKRSDDEAMDKRAWQDLNSAWGKRGWQDMSSAWGKRAWQDLNSAWGKRGW  
NDMSSAWGKRAWQDLNSAWGKRGWQDMSSAWGKRAPEKWAAFHGSWGKRAAEPD  
YEELDAAIEQLVPIHQMDDEDRMDAPEKKAWSALHGAWGKRPVKQAQFNSGAYYWKR  
EPGWTNLRGMWGKRSAPEEALTDHESSEARDEA

Eukaryota; Metazoa; Arthropoda; Hexapoda; Insecta; Pterygota; Neoptera; Endopterygota;  
Lepidoptera; Glossata; Ditrysia; Bombycoidea; Sphingidae; Sphinginae; Sphingini; Manduca.

Tardigrada

>OWA51718.1 hypothetical protein BV898\_16190 [Hypsibius dujardini]

MNYLMAFVCIALVAFLGSVLCVPAAVAPAKDSVALKAADEPSEHNDIIVKRDWNGMR  
AAWGKRADDYADLEEELPERQRRGPSSSWQSGMGAWGKRANDWGSMAAWGKRTP  
TEWNPEYIQTQLQRQMEAVKNRRAGTWQLASWGRRR

Eukaryota; Metazoa; Ecdysozoa; Tardigrada; Eutardigrada; Parachela; Hypsibiidae; Hypsibius.

>GAU98064.1 hypothetical protein RvY\_09262 [Ramazzottius varieornatus]

MEKIVSLSGLLCLLGFVLLGSFAPKTSAQSTAAISTGMDKAEKRDWADMKSSWGKRSQE  
PDDITVEDLQLAEIPTRSIREAAGWRDGMRASWGKRADRDVSNGWTSGLKAWGKRG  
WSQNLRAWGKRTPVEWTDEYVRSLQRQIAAAKNRRASNWQLASWGK  
Eukaryota; Metazoa; Ecdysozoa; Tardigrada; Eutardigrada; Parachela; Hypsibiidae;  
Ramazzottius.

#### Nematoda

>NP\_001252155.1 Neuropeptide-Like Protein [Caenorhabditis elegans]  
MQLIHFIIVGLAMLISLSLAASDDRVLGWNKAHGLWGKRSVQEASQDKRTPQNWNKLN  
SLWGKRSASSFDDDDYTTENGDDDDVTMLYKRSPAQWQRANGLWGR  
Eukaryota; Metazoa; Ecdysozoa; Nematoda; Chromadorea; Rhabditida; Rhabditina;  
Rhabditomorpha; Rhabditoidea; Rhabditidae; Peloderinae; Caenorhabditis.

>KHN83875.1 hypothetical protein Tcan\_11366 [Toxocara canis]  
MMCSQSSLALQMLRAGIVLLVVIVSLSPSTLAYEIDKRNNWNKAVGLWGKRIPSQLL  
DSGLEKRPQNQWNKLNLSLWGKRSSWQTANGLWGKRSSWQTANGLWGKRSLRFEELD  
GYH  
Eukaryota; Metazoa; Ecdysozoa; Nematoda; Chromadorea; Ascaridida;  
Ascaridoidea; Toxocaridae; Toxocara.

#### Priapulida

>XP\_014663362.1 PREDICTED: prothoracicostatic peptide-like [Priapulus caudatus]  
MQMTCCHCYLLLLAGLAALALAEDTNELGNAVDIDAPHDDKRGWHDLDGHAYGKR  
AGWHDLDQTSWGKRDNDADADEQEKRGWHDLDTAFGKRGWRDLNTAFGKRGWRDLNTA  
FGKRGWRDLRMAFGKRDAVDTAEDQLVADEEKRGWHDLDNTAFGKRGWRSLNSAFGK  
RGDNSAAIIEDLITEQLFDDIDSDGDKCIDRKELRLLVKKLLAGEL  
Eukaryota; Metazoa; Ecdysozoa; Scalidophora; Priapulida; Priapulidae; Priapulus.

#### Cnidaria

>AYD75757.1 GLWamide precursor [Nematostella vectensis]  
MALFGHTLVAVLFLCLALCHAETKRKAADTTDTENELDASPNVNDDDDNDIKRMPTDTK  
RQAGAPGLWGKRDAGPPGLWGKRDAGPPGLWGKRSPKPPGLWGKRQAGAPGLWGK  
RSAGPPGLWGKRDAGPPGLWGKRVAGPPGLWGKRQAGAPGLWGREAGAPGLWGKR  
QAGAPGLWGKREAGAPGLWGREANAPGLWGKRRAAGAPGLWGKREANAPGLWGKRQ  
AGPPGLWGKREANAPGLWGKRQAGPPGLWGKREANAPGLWGKRQAGPPGLWGKRD  
EDEDEDMDDETNGDPLWGRSADAGPPGLWGRKKRAASPQRDLYGIGLWGRNAALMTA  
EELDLSFKNEEQS  
Eukaryota; Metazoa; Cnidaria; Anthozoa; Hexacorallia; Actiniaria; Edwardsiidae; Nematostella.

>XP\_002164748.1 PREDICTED: LWamide neuropeptides [Hydra vulgaris]  
MGMFERKKIVLLVSLICVSQQATNVQDANSKSTSTELKVVKPQKRVTVPKDAEKLILR  
TQDNSLDLNTNGEEVWDELTHNIPLEYIEKIYNELNQLAQNENRKPRLWGATAAINTDN  
LNPEVENELNKKNPVIEKFERPIGLWHKDIETKNPENRLPLGLWGKDSEPLPIGLWGK  
DADVNDLLKKEPLPIGLWGKDTDSTRGDNKPNAKYGKLPGLWGKDNLALNDLGGKN  
NGKDSGPPPLWGKDSKPIPLWGKDNGPMTGLWGKKDVGPPPPLWGKKDQPPIGM

WGRAGKRDSNPYPGLWGKKEELENVDKEIEEDSLEEFACLLNPPCEIQEKRYNIDKS  
GPPPGLWGKRSEKYQMKNPPWRGGMWGRSEILENSVHDSKKTNTIDMEHAEN  
Eukaryota; Metazoa; Cnidaria; Hydrozoa; Hydroidolina; Anthoathecata; Aplanulata; Hydridae;  
Hydra.

>ALY05321.1 peptide precursor 2 [Clytia hemisphaerica]  
MKIYFGCLFVILSVNQIGCYPSSNQNSERELVRRYKTVHPNPHYQVNEIQRVKEALKRR  
VLENVHRVDSLKASLKRVLGQDAGNGFHLSSSKIFQKKRSKARLPHSYMFRKRQNSPG  
ALGLWGREVEAPGDIGPPGIWGDVVPDETRKDKPGAVQGLWGKDERVIRALLKTLKR  
Eukaryota; Metazoa; Cnidaria; Hydrozoa; Hydroidolina; Leptothecata; Campanulariidae; Clytia.

>ARN59429.1 pp11 precursor [Clytia hemisphaerica]  
MDQSLSSILLCCWVALTTCMSVQRKEAGDALSDKENAKKSANSITEELARNLME  
HLYDEIRKRSNSNEETISNFRASSDTHRQQQAPKGLWGRELQPGNPPGLWGREASEAE  
NTDSNDGPIPGMWGRREADDKNAHEKFQ  
Eukaryota; Metazoa; Cnidaria; Hydrozoa; Hydroidolina; Leptothecata; Campanulariidae; Clytia.

>sp|Q16992.1|LWA\_ ANTEL RecName: Full=LWamide neuropeptides; Contains: RecName:  
Full=LWamide I; Contains: RecName: Full=Metamorphosin A; Short=MMA; AltName:  
Full=LWamide II; Contains: RecName: Full=LWamide III; Contains: RecName: Full=LWamide  
IV; Contains: RecName: Full=LWamide V; Contains: RecName: Full=LWamide VI; Contains:  
RecName: Full=LWamide VII; Contains: RecName: Full=LWamide VIII; Contains: RecName:  
Full=LWamide IX; Flags: Precursor  
MALKCHLVLLAITLLLAQCSGSVDKKDSTTNHLDEKKTDS TEAHIVQETDALKENSYLG  
AEEESKEEDKKRSAAPQQPGLWGKRQKIGLWGRSADAGQPGLWGKRQSPGLWGRSAD  
AGQPGLWGKRQNPGLWGRSADAGQPGLWGKRQNPGLWGRSADAGQPGLWGKRQNP  
GLWGRSADARQPGLWGKREIYALWGGKRQNPGLWGRSADPGQPGLWGKRELVGLW  
GGKRQNPGLWGRSAEAGQPGLWGKRQKIGLWGRSADPLQPGLWGKRQNPGLWGR  
SADPQQPGLWGKRQNPGLWGRSADPQQPGLWGKRQNPGLWGRSADPQQPGLWGKRQ  
NPGLWGRSADPQQPGLWGKSPGLWGRSADPQQPGLWGKRQNPGLWGRSADPQQPGL  
WGKRQNPGLWGRSADPQQPGLWGKRQNPGLWGRSADPQQPGLWGKRQNPGLWGRS  
ADPQQPGLWGKRQNPGLWGRSAGSGQLGLWGKRQSRIGLWGRSAEPPQFEDLEDLKK  
KSAIPQPKGQ  
Eukaryota; Metazoa; Cnidaria; Anthozoa; Hexacorallia; Actiniaria; Actiniidae; Anthopleura.

Placozoa

>RDD46844.1 Antho-RFamide neuropeptides type 2 [Trichoplax sp. H2]  
MLTNRFIWILFLGITTAQNVAKGKAQIGNHKS VFLKNEATRPERDQPPRWGRDQPTRW  
GRDQPPRWGRDQPPRWGRDQPSRWGRDQPPRWGRDQPPRWGRDQPPRWGRDQPPRW  
GRDQPPRWGRDQPPRWGRDQPPRWGRDQPPRWGRDQPPRWGGDQLPEIEKNYAPPR  
WGRDQYSWWNQEQYPSRWGREYSTPDNTAEKLLDSLTHQSENAKKNNFQEINSDSNS  
GNESAVHRLFSNKLKNQKAKSDSNKLMNSFSGSEISRPREKSLKRSETLDNMRIDLI  
Eukaryota; Metazoa; Placozoa; Trichoplax.
